# Supplementary material
Source: Springer Nature journal article supplement (https://www.springermedizin.de/resource/supplementary/13012_2013_850_MOESM2_ESM.pdf/9630596)
Supplement: MOESM2 [file 9630596]

| INTERVENTION ACTIVITY<br>&<br><i>Included Components</i>                                                                                                                                                                                                                                                                                                                                                              | MONTHS |   |   |   |   |   |   |   |   |    |    |    |
|-----------------------------------------------------------------------------------------------------------------------------------------------------------------------------------------------------------------------------------------------------------------------------------------------------------------------------------------------------------------------------------------------------------------------|--------|---|---|---|---|---|---|---|---|----|----|----|
|                                                                                                                                                                                                                                                                                                                                                                                                                       | 1      | 2 | 3 | 4 | 5 | 6 | 7 | 8 | 9 | 10 | 11 | 12 |
| <b>Pre-workshop meetings</b><br>Meeting of primary change agent and Site Champions for <i>situational analysis</i> and <i>preliminary target setting</i> . Meeting of primary change agent and hospital executives or administrators                                                                                                                                                                                  |        |   |   |   |   |   |   |   |   |    |    |    |
| <b>Collaborative communal workshops</b><br>Meeting of representatives from site working groups with research team for <i>situational analysis</i> , <i>performance feedback</i> , <i>motivation from primary change agent</i> , <i>information-based target setting</i> , <i>inter-site collaborative problem solving</i> , <i>professional development of champion skills</i>                                        |        |   |   |   |   |   |   |   |   |    |    |    |
| <b>Site-based working group workshops &amp; fortnightly meetings</b><br>Site team meets with researchers for a mini workshop re <i>situational analysis</i> , <i>motivation via change agents</i> , <i>information-based target setting</i> , <i>intra-site collaborative problem solving</i> . Ongoing site meetings re <i>action planning</i> , <i>performance monitoring</i> , <i>intra-site problem solving</i> . |        |   |   |   |   |   |   |   |   |    |    |    |
| <b>Web-based Training Modules</b><br>Web-based modules for all staff involved in stroke care for <i>professional development</i> in clinical decision making re thrombolysis                                                                                                                                                                                                                                          |        |   |   |   |   |   |   |   |   |    |    |    |
| <b>Regular telephone case monitoring</b><br>Primary change agent contacts Site Champions to <i>monitor performance</i> regarding decision and outcomes for thrombolysed cases                                                                                                                                                                                                                                         |        |   |   |   |   |   |   |   |   |    |    |    |
| <b>Bi-monthly feedback of tPA rate</b><br>Comparative <i>performance feedback</i> to members of each site working group                                                                                                                                                                                                                                                                                               |        |   |   |   |   |   |   |   |   |    |    |    |
| <b>Bi-monthly inter-site teleconferences</b><br>Teleconference with primary change agent and site representatives for <i>inter-site collaborative problem solving</i>                                                                                                                                                                                                                                                 |        |   |   |   |   |   |   |   |   |    |    |    |
